# Supplementary material for: The long non-coding RNA MEG3 plays critical roles in the pathogenesis of cholesterol gallstone
Source: PeerJ. 2021 Feb 23;9:e10803. doi: 10.7717/peerj.10803 (PMC7908887; doi:10.7717/peerj.10803)
Supplement: Supplemental Information 2 [file peerj-09-10803-s002.xlsx]

## Sheet: original Ct
		Group1							Group2							Group3
	小鼠编号	1	2	3	4	5	6	7	8	9	10	11	12	13	14	15	16	17	18	19	20	21
	GAPDH	20.13	22.25	20.67	22.21	22.66	21.83	21.9	22.65	21.16	22.33	21.76	22.37	21.39	21.65	20.51	20.62	18.87	19.99	21.05	20.38	20.92
1	CCKAR	28.36	29.55	28.22	29.6	30.17	28.51	29.63	29.68	27.06	28.48	28.19	29.91	28.07	28.36	28.75	27.93	26.69	27.51	28.95	27.81	28.91
2	cyp7a1	27.06	26.86	21.29	26.15	27.09	25.33	25.71	27.86	25.5	21.87	25.41	24.77	25.2	25.44	27.85	26.41	23.52	27.86	28.21	24.59	25.59
3	FXR2（重复）	32.64	34.96	34.91	34.92	34.98	34.83	34.77	34.63	34.32	35.91	34.5	34.66	31.88	34.63	33.67	33.81	34.92	34.24	34.79	33.5	33.6
4	Srebf2	28.75	28.84	26.04	28.23	29.48	28.48	27.09	31.66	27.41	27.06	27.67	28.85	27.29	26.85	29.95	27.42	24.15	28.03	28.29	28.81	27.16
5	Hmgcr	29.63	27.78	24.44	30.98	30.29	28.43	28.57	30.98	25.5	25.14	29.35	29.62	27.07	27.61	30.43	28.68	22.9	29.09	28.99	28.56	28.03
6	Scarb1	29.42	28.45	23.47	30.55	31.6	30.46	30.17	31.58	26.79	25.42	30.09	30.58	29.81	30.93	29.97	27.05	23.54	29.69	29.93	29.58	30.58
7	Abcb11	20.71	23.23	21.57	22.5	23.09	22.48	22.42	21.91	21.37	21.48	21.13	21.59	20.55	21.79	21.52	21.87	20.41	21.42	21.83	21.72	22.42
8	4732465J04Rik	33.38	34.91	33.74	33.25	34.53	33.84	33.98	34.26	33.99	33.98	31.71	33.68	32.83	33.36	33.68	33.98	32.7	31.67	33.79	33.15	33.66
		Group4							Group5											Group6
		22	23	24	25	26	27	28	29	30	31	32	33	33	33	34	35	36	37	38	39	40
	GAPDH	20.13	20.84	18.36	18.69	19.1	19.26	19.58	18.07	19.22	19.14	19.91	19.83	19.82	19.8	18.81	19.71	21.48	20.78	21.04	20.18	22.21
1	CCKAR	30.35	28.44	28.45	28.83	28.69	28.85	29.07	25.97	25.99	26.35	27.01	27.76	26.72	27.62	26.01	25.51	28.12	27.14	28.07	26.18	29.48
2	cyp7a1	27.5	26.93	21.06	24.67	25.12	25.4	24.25	25.14	24.41	19.12	24	23.9	24.14	24.32	24.75	23.5	20.33	23.45	23.72	22.89	24.78
3	FXR2（重复）	31.9	34.42	33.76	32.05	32.35	32.28	33.87	30.19	34.09	35.38	33.65	33.95	32.21	33.65	29.19	32.44	34.86	33.23	33.12	30.27	34.32
4	Srebf2	29.55	27.64	23.33	25.91	26.08	25.81	26.69	27.23	25.8	23.9	26.01	26.62	25.77	25.43	26.85	25.45	25.52	26.62	27.06	25.45	26.33
5	Hmgcr	29.38	26.61	22.33	27.36	27.76	26.25	26.06	27.73	25.03	22.88	28.89	27.88	26.86	26.81	27.69	24.21	23.79	28.07	27.51	25.07	28.52
6	Scarb1	29.37	28.05	23.08	28.15	28.94	29.36	28.87	27.35	25.45	22.17	28.91	28.75	28.65	28.72	27.39	25.52	23.36	28.64	29.09	28.27	30.27
7	Abcb11	21.07	21.28	19.4	19.17	19.41	19.5	19.13	18.57	20.19	19.89	20.66	20.36	20.41	20.69	18.27	19.41	20.73	20.39	19.91	19.78	21.81
8	4732465J04Rik	32.69	33.11	30.21	29.04	30.55	30.74	30.94	31.3	32.65	31.85	31.03	32.06	32.1	32.07	30.81	32.03	32.77	30.36	32.09	30.88	32.75
9	SCP2								28.24	30.53	26.92	27.66	27.67	27.23	27.51	29.19	30.94	29.56	28.7	28.84	27.36	29.71
10	KDM4A								29.59	29.03	28.8	29.03	29.48	29.69	29.65	29.41	28.33	29.89	29.16	30.02	28.98	30.84
11	PABPC4								27.28	25.56	23.95	25.07	25.98	25.33	25.81	28.39	27.73	27.23	27.36	27.77	27.15	29.18
12	CEP131(重复)								31.57	31.25	31.16	30.25	31.11	31.12	30.98	32.63	32.17	33.87	30.58	33.07	31.28	33.94
13	NUMBL								27.69	27.61	27.24	28.02	28.04	28.72	28.93	28.77	28.33	29.19	29.01	29.36	28.77	31.25
14	MEG3								24.32	25.8	23.53	23.94	26.89	25.75	25.88	25.08	26.74	26.13	25.32	28.52	26.12	28.41

## Sheet: GAPDH
		normal control group	model group
	mice	group5	group6
	1	18.07	18.81
	2	19.22	19.71
	3	19.14	21.48
	4	19.91	20.78
	5	19.83	21.04
	6	19.82	20.18
	7	19.8	22.21
	mean	19.3986	20.6014

## Sheet: SCP2
			normal control group	model group
		mice	group5	group6
		1	28.24	29.19
		2	30.53	30.94
		3	26.92	29.56
		4	27.66	28.7
		5	27.67	28.84
		6	27.23	27.36
		7	27.51	29.71
		1	18.07	18.81
		2	19.22	19.71
		3	19.14	21.48
	GAPDH	4	19.91	20.78
		5	19.83	21.04
		6	19.82	20.18
		7	19.8	22.21
			10.17	10.38
			11.31	11.23
	△Ct(gene-GAPDH)		7.78	8.08
			7.75	7.92
			7.84	7.8
			7.41	7.18
			7.71	7.5
			10.17	10.17
			11.31	11.31
			7.78	7.78
			7.75	7.75
			7.84	7.84
			7.41	7.41
			7.71	7.71
			0	0.21
	△△Ct(GroupX-Group1)		0	-0.08
			0	0.3
			0	0.17
			0	-0.04
			0	-0.23
			0	-0.21
			1	1.15669
	2△△Ct(GroupX-Group1)		1	0.946058
			1	1.23114
			1	1.12506
			1	0.972655
			1	0.852635
			1	0.864537
			1	0.864537
	1/2△△Ct(GroupX-Group1)		1	1.05702
			1	0.812252
			1	0.888843
			1	1.02811
			1	1.17283
			1	1.15669
		mean	1	0.997184
		sd	0	0.14397
			normal control group	model group
			1	0.997184

## Sheet: KDM4A
			normal control group	model group
		mice	group5	group6
		1	29.59	27.41
		2	29.03	26.33
		3	28.8	27.89
		4	29.03	27.16
		5	29.48	28.02
		6	29.69	26.98
		7	29.65	28.84
		1	18.07	18.81
		2	19.22	19.71
		3	19.14	21.48
	GAPDH	4	19.91	20.78
		5	19.83	21.04
		6	19.82	20.18
		7	19.8	22.21
			11.52	8.6
	△Ct(gene-GAPDH)		9.81	6.62
			9.66	6.41
			9.12	6.38
			9.65	6.98
			9.87	6.8
			9.85	6.63
			11.52	11.52
			9.81	9.81
			9.66	9.66
			9.12	9.12
			9.65	9.65
			9.87	9.87
			9.85	9.85
	△△Ct(GroupX-Group1)		0	-2.92
			0	-3.19
			0	-3.25
			0	-2.74
			0	-2.67
			0	-3.07
			0	-3.22
	2△△Ct(GroupX-Group1)		1	0.132127
			1	0.109576
			1	0.105112
			1	0.149685
			1	0.157127
			1	0.11908
			1	0.107321
	1/2△△Ct(GroupX-Group1)		1	7.56846
			1	9.12611
			1	9.51366
			1	6.6807
			1	6.36429
			1	8.39773
			1	9.31787
		mean	1	8.1384
		sd	0	1.28598
			normal control group	model group
			1	8.1384

## Sheet: PABPC4
			normal control group	model group
		mice	group5	group6
		1	27.28	28.39
		2	25.56	27.73
		3	23.95	27.23
		4	25.07	27.36
		5	25.98	27.77
		6	25.33	27.15
		7	25.81	29.18
		1	18.07	18.81
		2	19.22	19.71
		3	19.14	21.48
	GAPDH	4	19.91	20.78
		5	19.83	21.04
		6	19.82	20.18
		7	19.8	22.21
			9.21	9.58
	△Ct(gene-GAPDH)		6.34	8.02
			4.81	5.75
			5.16	6.58
			6.15	6.73
			5.51	6.97
			6.01	6.97
			9.21	9.21
			6.34	6.34
			4.81	4.81
			5.16	5.16
			6.15	6.15
			5.51	5.51
			6.01	6.01
	△△Ct(GroupX-Group1)		0	0.37
			0	1.68
			0	0.94
			0	1.42
			0	0.58
			0	1.46
			0	0.96
			1	1.29235
	2△△Ct(GroupX-Group1)		1	3.20428
			1	1.91853
			1	2.67586
			1	1.49485
			1	2.75108
			1	1.94531
			1	0.773782
	1/2△△Ct(GroupX-Group1)		1	0.312083
			1	0.521233
			1	0.373712
			1	0.668964
			1	0.363493
			1	0.514057
		mean	1	0.503903
		sd	0	0.170266
			normal control group	model group
			1	0.503903

## Sheet: CEP131
			normal control group	model group
		mice	group5	group6
		1	30.57	32.63
		2	30.25	32.17
		3	30.16	33.87
		4	29.25	30.58
		5	29.11	33.07
		6	29.12	31.28
		7	29.98	33.94
		1	18.07	18.81
		2	19.22	19.71
		3	19.14	21.48
	GAPDH	4	19.91	20.78
		5	19.83	21.04
		6	19.82	20.18
		7	19.8	22.21
			12.5	13.82
			11.03	12.46
	△Ct(gene-GAPDH)		11.02	12.39
			9.34	9.8
			9.28	12.03
			9.3	11.1
			10.18	11.73
			13.5	13.5
			12.03	12.03
			12.02	12.02
			10.34	10.34
			11.28	11.28
			11.3	11.3
			11.18	11.18
			-1	0.32
	△△Ct(GroupX-Group1)		-1	0.43
			-1	0.37
			-1	-0.54
			-2	0.75
			-2	-0.2
			-1	0.55
			0.5	1.24833
	2△△Ct(GroupX-Group1)		0.5	1.34723
			0.5	1.29235
			0.5	0.687771
			0.25	1.68179
			0.25	0.870551
			0.5	1.46409
			2	0.80107
	1/2△△Ct(GroupX-Group1)		2	0.742262
			2	0.773782
			2	1.45397
			4	0.594604
			4	1.1487
			2	0.68302
		mean	2.57143	0.885344
		sd	0.9759	0.305008
			normal control group	model group
			2.57143	0.885344

## Sheet: NUMB1
			normal control group	model group
		mice	group5	group6
		1	27.69	29.77
		2	27.61	29.33
		3	27.24	30.19
		4	28.02	30.01
		5	28.04	30.36
		6	28.72	30.77
		7	28.93	32.25
		1	18.07	18.81
		2	19.22	19.71
		3	19.14	21.48
	GAPDH	4	19.91	20.78
		5	19.83	21.04
		6	19.82	20.18
		7	19.8	22.21
			9.62	10.96
	△Ct(gene-GAPDH)		8.39	9.62
			8.1	8.71
			8.11	9.23
			8.21	9.32
			8.9	10.59
			9.13	10.04
			9.62	9.62
			8.39	8.39
			8.1	8.1
			8.11	8.11
			8.21	8.21
			8.9	8.9
			9.13	9.13
	△△Ct(GroupX-Group1)		0	1.34
			0	1.23
			0	0.61
			0	1.12
			0	1.11
			0	1.69
			0	0.91
			1	2.53151
	2△△Ct(GroupX-Group1)		1	2.34567
			1	1.52626
			1	2.17347
			1	2.15846
			1	3.22657
			1	1.87905
	1/2△△Ct(GroupX-Group1)		1	0.395021
			1	0.426317
			1	0.655197
			1	0.460094
			1	0.463294
			1	0.309927
			1	0.532185
		mean	1	0.463148
		sd	0	0.108883
			normal control group	model group
			1	0.463148

## Sheet: MEG3
		normal control group	model group
	mice	group5	group6
	1	24.32	26.08
	2	25.8	27.74
	3	23.53	27.13
	4	23.94	26.32
	5	26.89	29.52
	6	25.75	27.12
	7	25.88	29.41
	1	18.07	18.81
	2	19.22	19.71
	3	19.14	21.48
GAPDH	4	19.91	20.78
	5	19.83	21.04
	6	19.82	20.18
	7	19.8	22.21
		6.25	7.27
△Ct(gene-GAPDH)		6.58	8.03
		4.39	5.65
		4.03	5.54
		7.06	8.48
		5.93	6.94
		6.08	7.2
		6.25	6.25
		6.58	6.58
		4.39	4.39
		4.03	4.03
		7.06	7.06
		5.93	5.93
		6.08	6.08
△△Ct(GroupX-Group1)		0	1.02
		0	1.45
		0	1.26
		0	1.51
		0	1.42
		0	1.01
		0	1.12
		1	2.02792
2△△Ct(GroupX-Group1)		1	2.73208
		1	2.39496
		1	2.8481
		1	2.67586
		1	2.01391
		1	2.17347
1/2△△Ct(GroupX-Group1)		1	0.493116
		1	0.366021
		1	0.417544
		1	0.351111
		1	0.373712
		1	0.496546
		1	0.460094
	mean	1	0.422592
	sd	0	0.0613375
		normal control group	model group
		1	0.422592
